# Supplementary material for: Reliability of Time-Series Plasma Metabolome Data over 6 Years in a Large-Scale Cohort Study
Source: MDPI journal article supplement (doi:10.3390/metabo14010077), 2024-01-22

Figure S1. Histograms of the CV of QC samples (A), approximate ICC (B), and change rate of QC samples (C) stratified by cations (1) and anions (2). CV, coefficient of variation. QC, quality control. ICC, intraclass correlation coefficient.

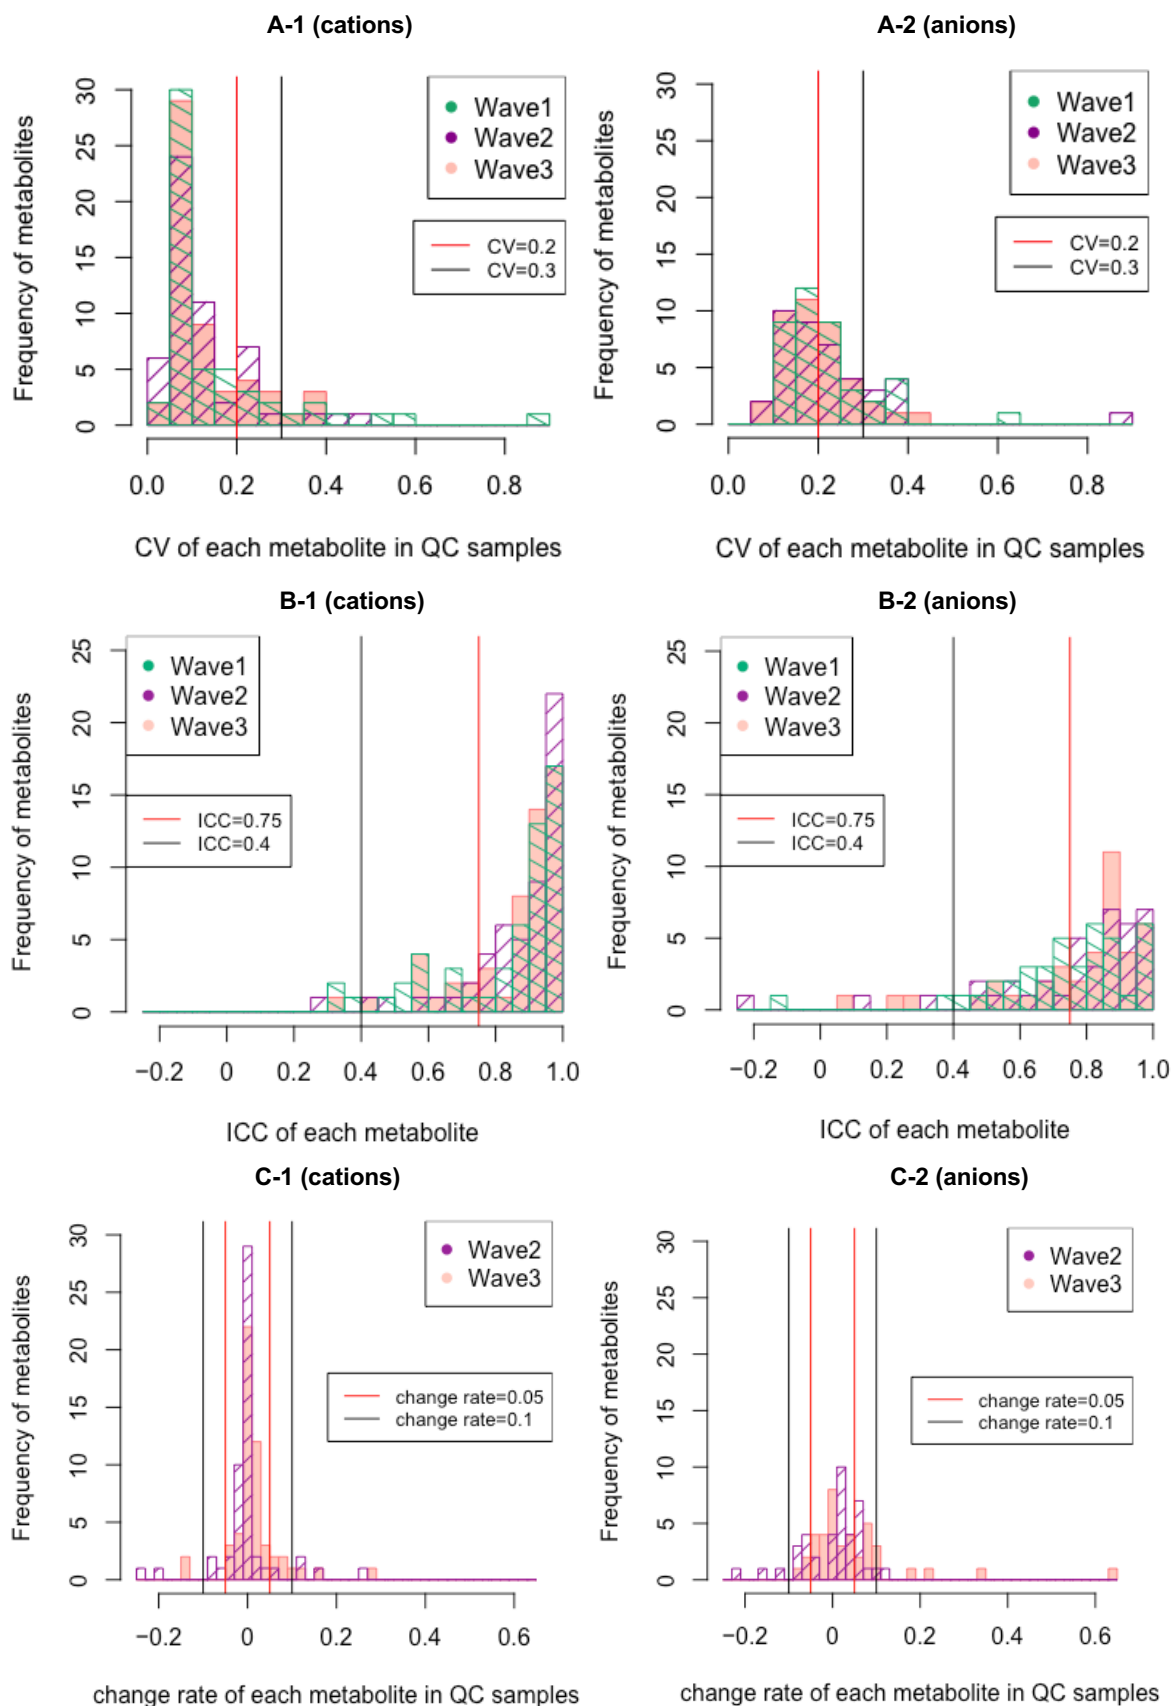

Supplement: s1 [file s1]
